# Supplementary material for: Synthesis of a novel amphiphilic polymeric ionic liquid and its application in quasi-solid-state dye-sensitized solar cells
Source: Royal Society of Chemistry journal article supplement (doi:10.1039/c4ta05436a), 2014-10-23
Supplement: c4ta05436a1.pdf [file c4ta05436a1.pdf]

## Electronic Supplementary Information

### Synthesis of A Novel Amphiphilic Polymeric Ionic Liquid and Its Application in Quasi-Solid-State Dye-Sensitized Solar Cells

Ling-Yu Chang,<sup>a,‡</sup> Chuan-Pei Lee,<sup>b,‡</sup> Chun-Ting Li,<sup>b</sup> Min-Hsin Yeh,<sup>b</sup> Kuo-Chuan Ho<sup>a,b\*</sup> and Jiang-Jen Lin<sup>a\*\*</sup>

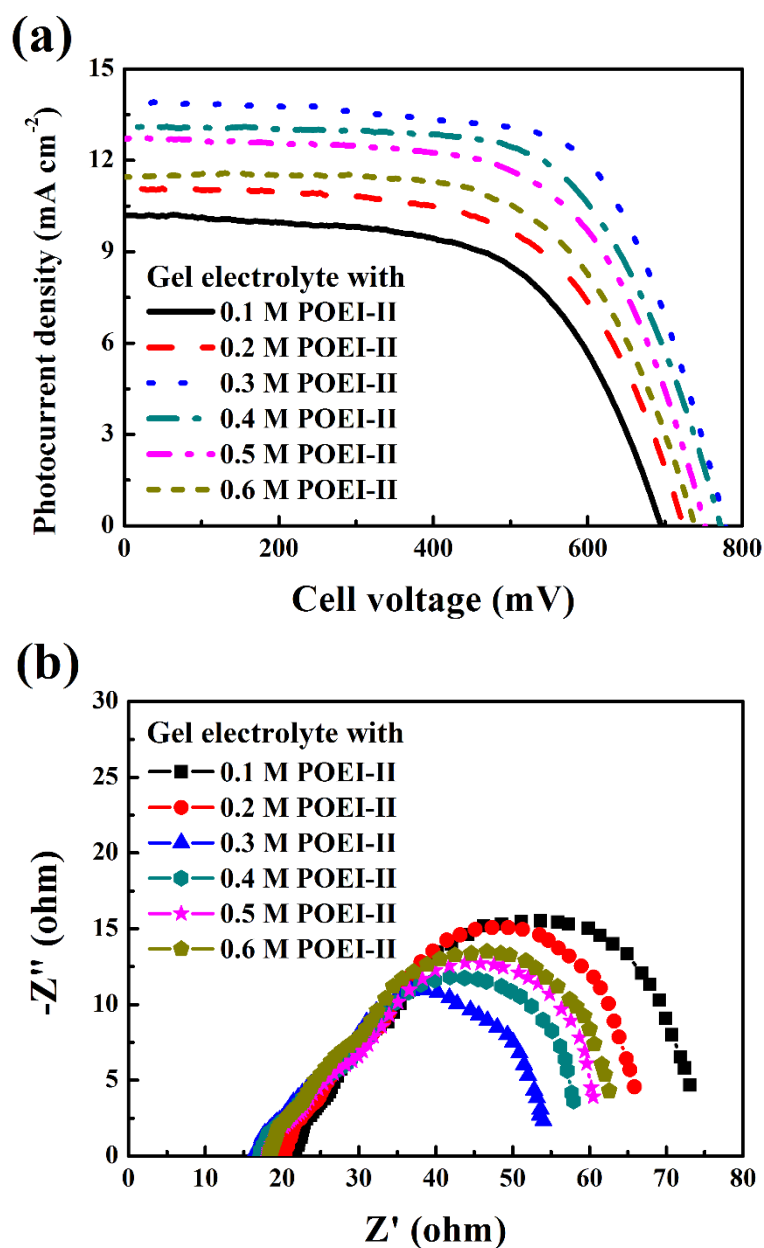

**Fig. S1.** (a) Photocurrent density-voltage curves and (b) EIS spectra of the DSSCs using the gel electrolytes containing different concentration of POEI-II, measured at  $100 \text{ mW cm}^{-2}$  light intensity.

**Table S1.** Photovoltaic and EIS parameters of the DSSCs using the gel electrolytes containing different concentration of POEI-II, measured at 100 mW cm<sup>-2</sup> light intensity.

| Gel electrolyte with different concentration of POEI-II (M) | $V_{oc}$ (mV) | $J_{sc}$ (mA cm <sup>-2</sup> ) | $\eta$ (%) | FF   | $Z_w$ ( $\Omega$ ) |
|-------------------------------------------------------------|---------------|---------------------------------|------------|------|--------------------|
| 0.1                                                         | 693           | 10.19                           | 4.27       | 0.60 | 47.29              |
| 0.2                                                         | 722           | 11.06                           | 4.89       | 0.61 | 41.69              |
| 0.3                                                         | 778           | 13.97                           | 7.19       | 0.66 | 36.00              |
| 0.4                                                         | 771           | 13.12                           | 6.53       | 0.65 | 37.03              |
| 0.5                                                         | 752           | 12.71                           | 6.02       | 0.63 | 37.71              |
| 0.6                                                         | 738           | 11.46                           | 5.33       | 0.63 | 40.31              |

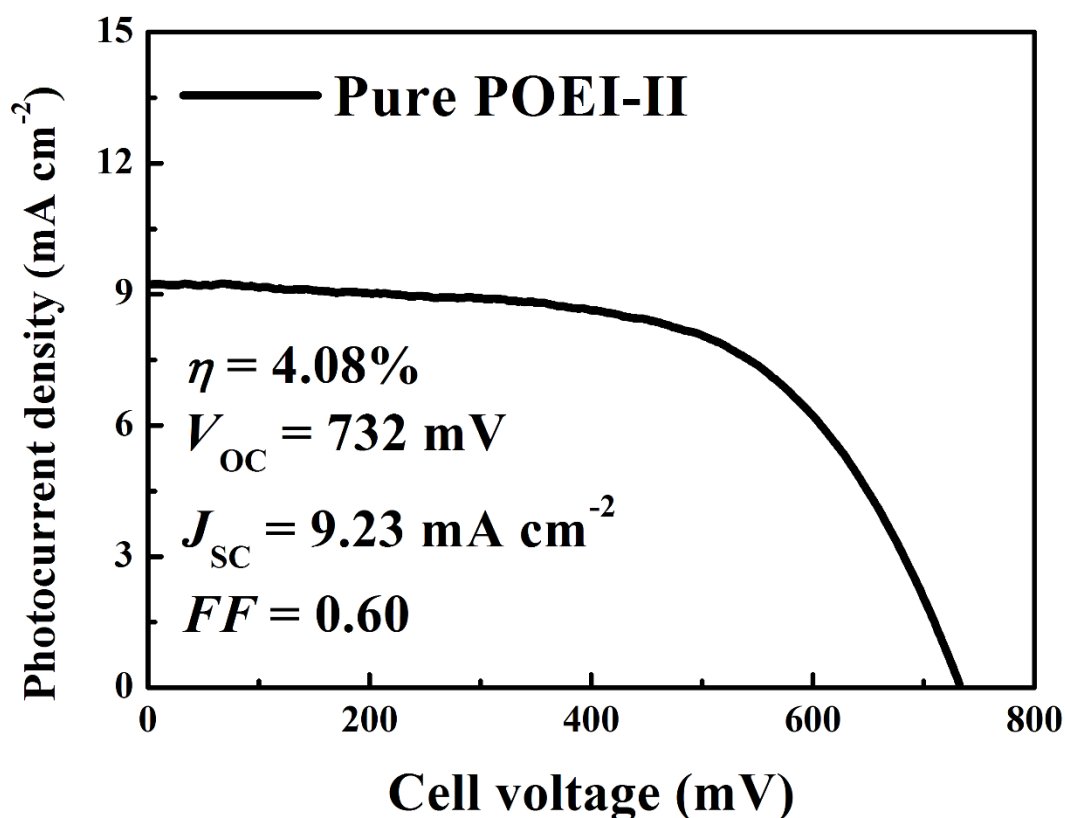

**Fig. S2.** Photocurrent density-voltage curves of the DSSCs using pure POEI-II as the electrolyte, measured at 100 mW cm<sup>-2</sup> light intensity.

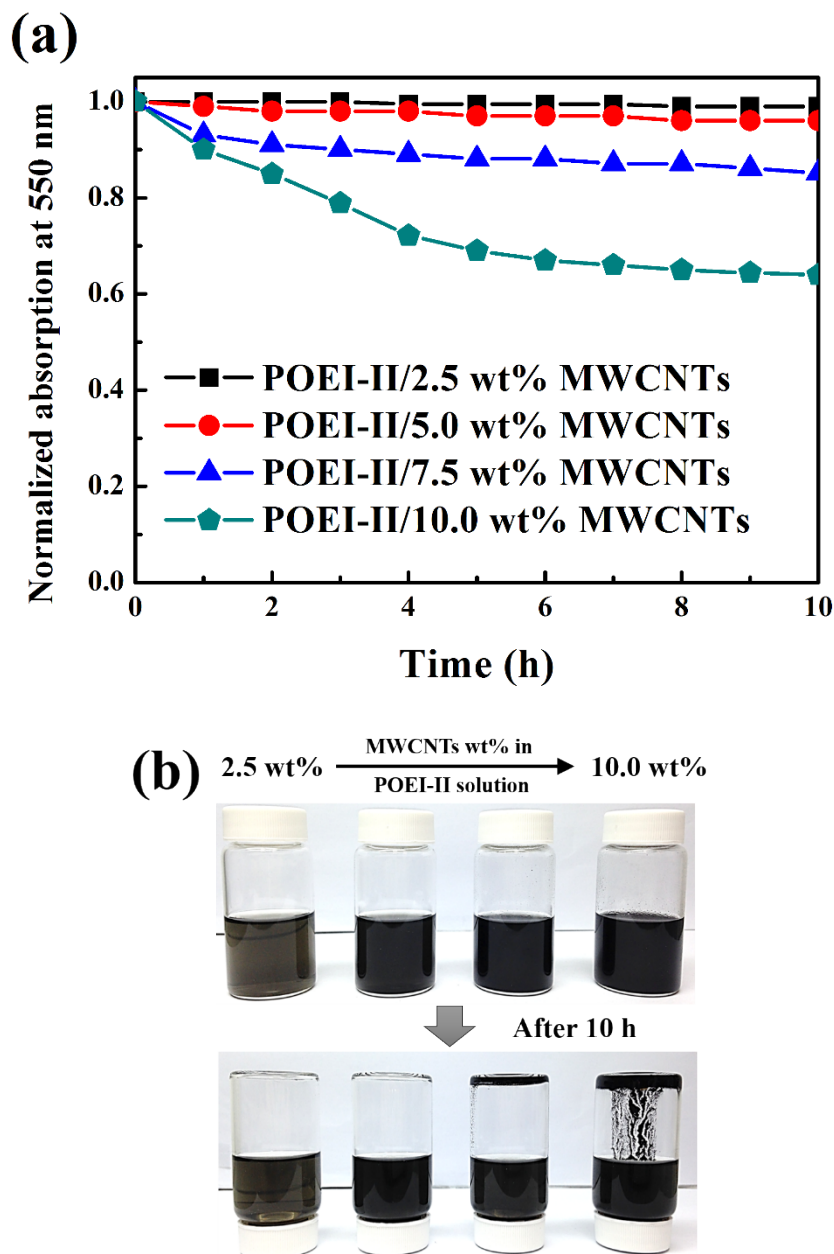

**Fig. S3.** (a) Plots of normalized absorption versus time at 550 nm for the POEI-II based ACN solutions containing different amount of MWCNTs (2.5 wt% to 10.0 wt%), and (b) the corresponding photographic images at 0 and 10 h separately.
